# Supplementary material for: A new photoelectrochemical biosensor for ultrasensitive determination of nucleic acids based on a three-stage cascade signal amplification strategy
Source: Royal Society of Chemistry journal article supplement (doi:10.1039/c8an00609a), 2018-01-01
Supplement: c8an00609a1.pdf [file c8an00609a1.pdf]

## Electronic Supplementary Information

### **A new photoelectrochemical biosensor for ultrasensitive determination of nucleic acid based on three-stage cascade signal amplification strategy**

Erhu Xiong, Xiaoxia Yan, Xiaohua Zhang,\* Yanmei Li, Ruiying Yang, Leixia Meng and Jinhua Chen\*

*State Key Laboratory of Chemo/Biosensing and Chemometrics, College of Chemistry and Chemical Engineering, Hunan University, Changsha, 410082, P. R. China*

#### **Table of contents**

- (1) Sequences of oligonucleotides
- (2) TEM images of pure TiO<sub>2</sub> and TiO<sub>2</sub>/CdS:Mn
- (3) EDS Mapping of ITO/TiO<sub>2</sub>/CdS:Mn sample
- (4) XRD patterns of TiO<sub>2</sub>, TiO<sub>2</sub>/CdS, and TiO<sub>2</sub>/CdS:Mn
- (5) The role of AA on the PEC response of the FPEC electrode
- (6) Optimization of the experimental conditions
- (7) Comparison of various analytical methods for DNA detection

---

\*Corresponding author. Tel.: +86-731-88821961  
E-mail address: chenjinhua@hnu.edu.cn; mickyxie@hnu.edu.cn

## (1) Sequences of oligonucleotides

**Table S1.** Sequences of oligonucleotides used in this work<sup>a</sup>

| Oligonucleotides | Sequences (from 5' to 3')                                    |
|------------------|--------------------------------------------------------------|
| C-DNA            | HS-(CH <sub>2</sub> ) <sub>6</sub> - <u>CCCAATTCCACCT</u>    |
|                  | <i>CTCCCGACCCAATTCCACCTTCGGGAGGGAA</i>                       |
| CHA-HP1          | <u>AAGATGCTATGCGAT</u> <u>CGAAGGTGGAAATTGGG</u>              |
|                  | <u>TCGATCGCATAGCATCTTTCCCTCCCGAAGGTG</u>                     |
| CHA-HP2          | <u>GAAATTGGGTCGG</u> <u>GGAGGGAAAAGATGCTCAT</u>              |
| HCR-HP1          | Biotin- <u>GATGCTCATTGGTGT</u> <u>ATGAGCATCTTTCC</u> -Biotin |
|                  | Biotin- <u>ACACCAATGAGCATCGGAAAAGATGCTCAT</u> -Biotin        |
| HCR-HP2          | n                                                            |
| T-DNA            | <i>CGAAGGTGGAAATTGGGTCGGGGAG</i>                             |
| Sm-DNA           | CGAAGGTGGACATTGGGTCGGGGAG                                    |
| Tm-DNA           | CGAATGTGGACATTGGGTCAGGGAG                                    |
| N-DNA            | TCGCACGGCTCATGACCTACAGAGCTCA                                 |

<sup>a</sup>Abbreviation: capture DNA (C-DNA), catalytic hairpin assembly (CHA), hybridization chain reaction (HCR), hairpin (HP), target DNA (T-DNA), single-base mismatched DNA (Sm-DNA), three-bases mismatched DNA (Tm-DNA), and non-complementary DNA (N-DNA). The sequences in the same color in different oligonucleotides are complementary and the underlined sequences in the same oligonucleotide are complementary. The T-DNA in italics and the CHA-HP1 in italics are complementary.

**(2) TEM images of pure TiO<sub>2</sub> and TiO<sub>2</sub>/CdS:Mn**

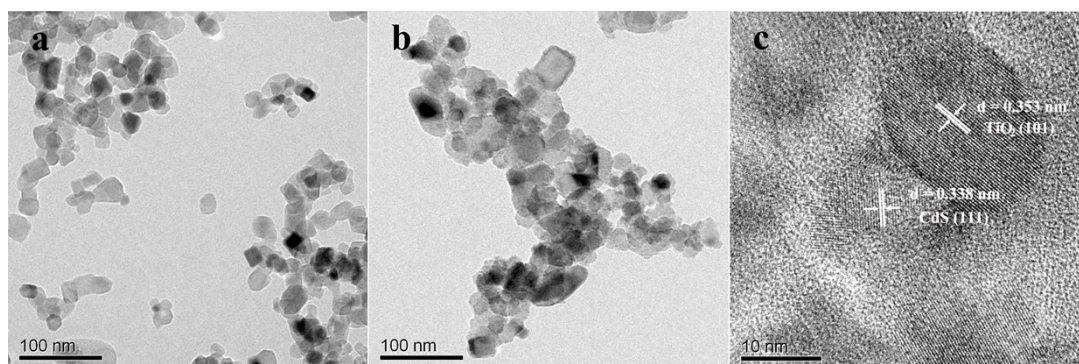

**Fig. S1** TEM images of (a) pure TiO<sub>2</sub> and (b) TiO<sub>2</sub>/CdS:Mn, HRTEM image of (c) TiO<sub>2</sub>/CdS:Mn.

**(3) EDS mapping of ITO/TiO<sub>2</sub>/CdS:Mn sample**

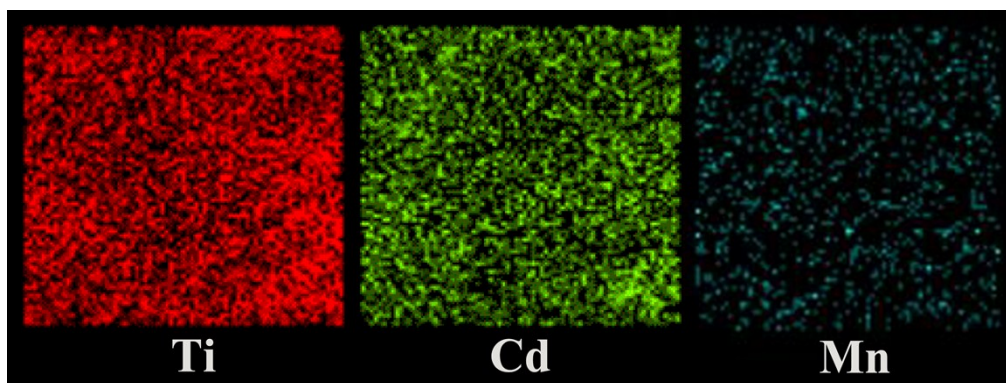

**Fig. S2** EDS mapping of ITO/TiO<sub>2</sub>/CdS:Mn sample.

#### (4) XRD patterns of TiO<sub>2</sub>, TiO<sub>2</sub>/CdS, and TiO<sub>2</sub>/CdS:Mn

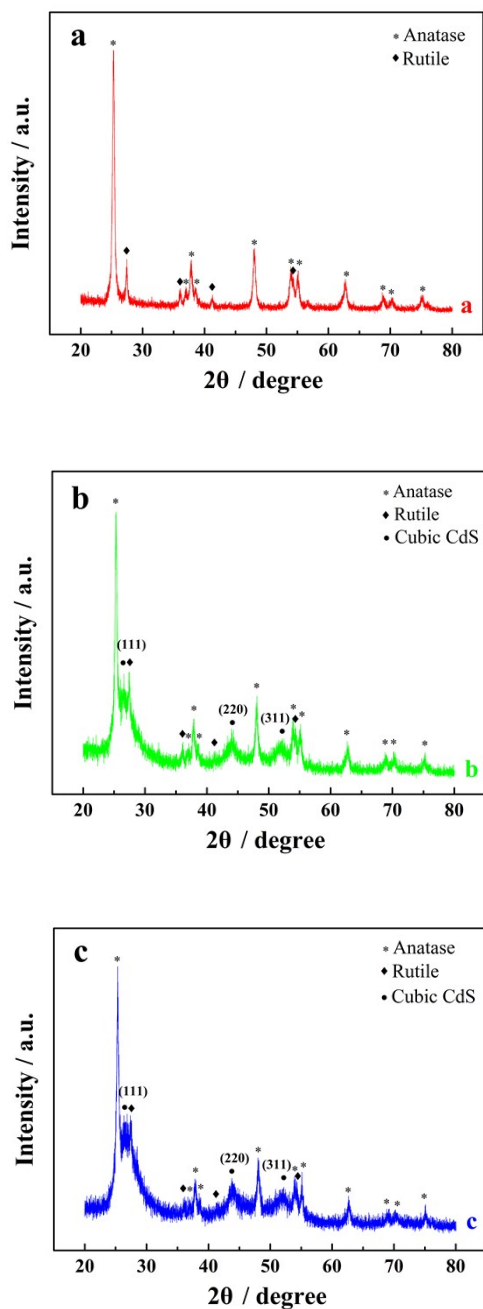

**Fig. S3** XRD patterns of TiO<sub>2</sub> (a), TiO<sub>2</sub>/CdS (b), and TiO<sub>2</sub>/CdS:Mn (c) samples.

All of these patterns show the same peaks at 25.32°, 37.0°, 37.79°, 38.58°, 48.03°, 53.93°, 55.11°, 62.71°, 68.87°, 70.31°, and 75.03°, corresponding to the diffractions from the (101), (103), (004), (112), (200), (105), (211), (204), (116), (220), and (215)

planes of anatase  $\text{TiO}_2$  (JCPDS no. 21-1272); and other peaks at  $27.42^\circ$ ,  $36.08^\circ$ ,  $41.19^\circ$ , and  $54.32^\circ$  correspond to the diffractions from the (110), (101), (111), and (211) planes of rutile  $\text{TiO}_2$  (JCPDS no. 21-1276). Besides, three characteristic peaks are observed at  $26.51^\circ$ ,  $44.08^\circ$ , and  $52.22^\circ$  in Figures S3B and S3C, which correspond to the diffractions of the (111), (220), and (311) planes of CdS cubic structure (JCPDS no. 80-0019).

**(5) The role of AA on the PEC response of the FPEC electrode**

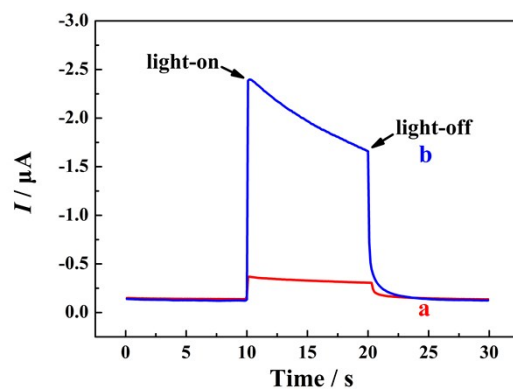

**Fig. S4** Photocurrent responses of the FPEC electrode in 10 mM Tris-HCl solution (pH 9.8) without AAP. Applied potential,  $-0.3$  V; T-DNA, 20 nM. (a) without AA, (b) with AA (1 mM).

## (6) Optimization of the experimental conditions

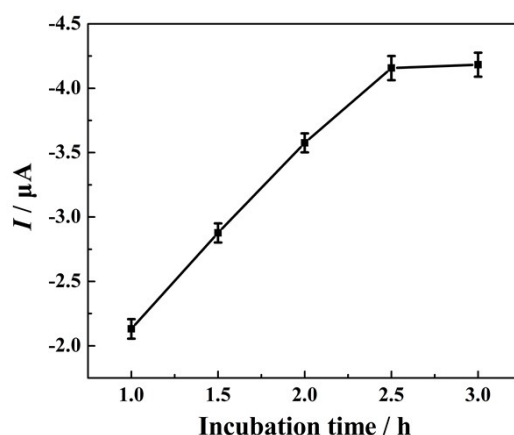

**Fig. S5** Incubation time for CHA process. The photocurrent intensity of the FPEC electrode was obtained in 10 mM Tris-HCl solution (pH 9.8) containing 0.1 mM  $\text{Mg}(\text{NO}_3)_2$  and 20 nM T-DNA. Applied potential,  $-0.3$  V; C-DNA concentration, 1.5  $\mu\text{M}$ ; AAP concentration, 10 mM; SA-ALP concentration, 0.1 mg/mL; the catalysis reaction time between ALP and AAP, 1.5 h. Error bars represent the standard deviation of three parallel experiments.

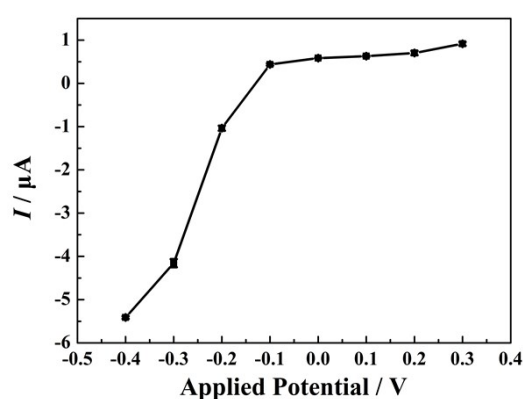

**Fig. S6** Influence of applied potential. The photocurrent intensity of the FPEC electrode was obtained in 10 mM Tris-HCl solution (pH 9.8) containing 0.1 mM  $\text{Mg}(\text{NO}_3)_2$  and 20 nM T-DNA. Incubation time for CHA process, 2.5 h; C-DNA concentration, 1.5  $\mu\text{M}$ ; AAP concentration, 10 mM; SA-ALP concentration, 0.1



mg/mL; the catalysis reaction time between ALP and AAP, 1.5 h. Error bars represent the standard deviation of three parallel experiments.

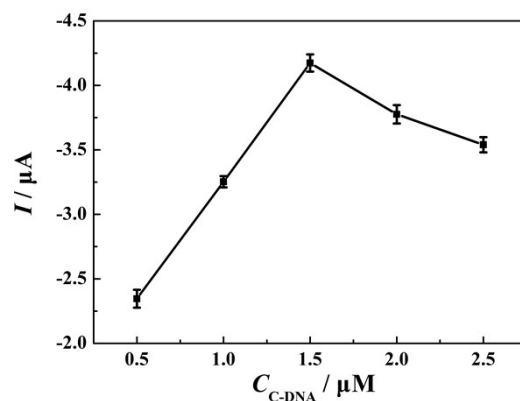

**Fig. S7** Influence of C-DNA concentration. The photocurrent intensity of the FPEC electrode was obtained in 10 mM Tris-HCl solution (pH 9.8) containing 0.1 mM  $Mg(NO_3)_2$  and 20 nM T-DNA. Incubation time for CHA process, 2.5 h; Applied potential,  $-0.3$  V; AAP concentration, 10 mM; SA-ALP concentration, 0.1 mg/mL; the catalysis reaction time between ALP and AAP, 1.5 h. Error bars represent the standard deviation of three parallel experiments.

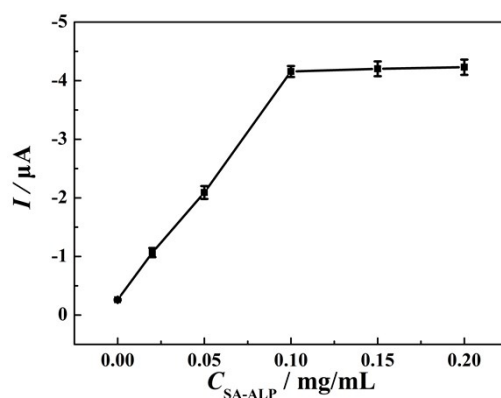

**Fig. S8** Influence of SA-ALP concentration. The photocurrent intensity of the FPEC electrode was obtained in 10 mM Tris-HCl solution (pH 9.8) containing 0.1 mM  $Mg(NO_3)_2$  and 20 nM T-DNA. Incubation time for CHA process, 2.5 h; Applied

potential,  $-0.3$  V; C-DNA concentration,  $1.5$   $\mu\text{M}$ ; AAP concentration,  $10$  mM; the catalysis reaction time between ALP and AAP,  $1.5$  h. Error bars represent the standard deviation of three parallel experiments.

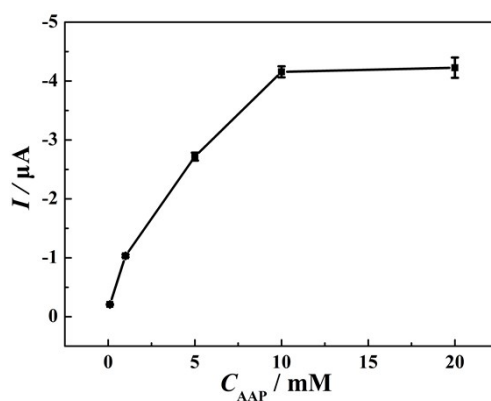

**Fig. S9** Influence of AAP concentration. The photocurrent intensity of the FPEC electrode was obtained in  $10$  mM Tris-HCl solution (pH  $9.8$ ) containing  $0.1$  mM  $\text{Mg}(\text{NO}_3)_2$  and  $20$  nM T-DNA. Incubation time for CHA process,  $2.5$  h; Applied potential,  $-0.3$  V; C-DNA concentration,  $1.5$   $\mu\text{M}$ ; SA-ALP concentration,  $0.1$  mg/mL; the catalysis reaction time between ALP and AAP,  $1.5$  h. Error bars represent the standard deviation of three parallel experiments.

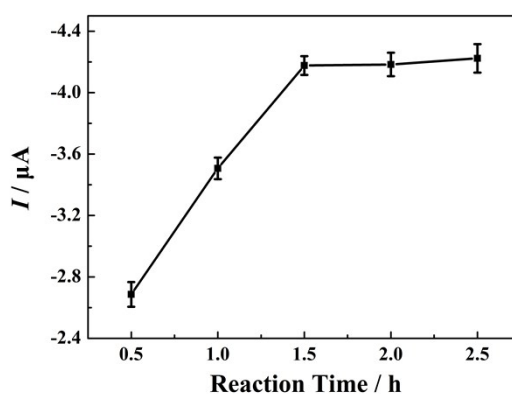

**Fig. S10** Influence of the catalysis reaction time between ALP and AAP. The photocurrent intensity of the FPEC electrode was obtained in  $10$  mM Tris-HCl

solution (pH 9.8) containing 0.1 mM  $\text{Mg}(\text{NO}_3)_2$  and 20 nM T-DNA. Incubation time for CHA process, 2.5 h; Applied potential,  $-0.3$  V; C-DNA concentration,  $1.5$   $\mu\text{M}$ ; AAP concentration, 10 mM; SA-ALP concentration, 0.1 mg/mL. Error bars represent the standard deviation of three parallel experiments.

**(7) Comparison of various analytical methods for DNA detection**

**Table S2.** Comparison of various analytical methods for DNA detection

| Analytical methods       | Linear range  | Detection limit | Reference |
|--------------------------|---------------|-----------------|-----------|
| Electrochemiluminescence | 10 fM–0.5 nM  | 1.4 fM          | 1         |
| Electrochemiluminescence | 0.1 pM–10 nM  | 0.1 pM          | 2         |
| Electrochemistry         | 1 fM–1 nM     | 0.43 fM         | 3         |
| Electrochemistry         | 1 pM–100 nM   | 0.9 pM          | 4         |
| Colormetry               | 10 fM–50 pM   | 2.6 fM          | 5         |
| Colormetry               | 50 fM–35 pM   | 50 fM           | 6         |
| Fluorescence             | 10 pM–100 pM  | 10 pM           | 7         |
| Fluorescence             | 0.5 nM–140 nM | 0.29 nM         | 8         |
| PEC                      | 5 fM–10 pM    | 2.2 fM          | 9         |
| PEC                      | 0.1 fM–100 pM | 0.052 fM        | This work |

## References

- 1 F. Y. Zhou, H. Hai, Y. L. Yuan, P. J. Li, *Electroanal.*, 2017, **29**, 983–989.
- 2 M. Jiao, G. F. Jie, L. Tan, S. Y. Niu, *Anal. Chim. Acta*, 2017, **983**, 166–172.
- 3 G. Y. Zhang, S. Y. Deng, W. R. Cai, S. Cosnier, X. J. Zhang, D. Shan, *Anal. Chem.*, 2015, **87**, 9093–9100.
- 4 E. H. Xiong, Z. Z. Li, X. H. Zhang, J. W. Zhou, X. X. Yan, Y. Q. Liu, J. H. Chen, *Anal. Chem.*, 2017, **89**, 8830–8835.
- 5 Y. H. Guo, J. Wu, J. Li, H. X. Ju, *Biosens. Bioelectron.*, 2016, **78**, 267–273.
- 6 L. Chang, Y. Khan, L. D. Li, N. Yang, P. G. Yin, L. Guo, *RSC Adv.*, 2017, **7**, 13896–13903.
- 7 J. H. Huang, X. F. Su, Z. G. Li, *Anal. Chem.*, 2012, **84**, 5939–5443.
- 8 Y. H. Guo, Q. M. Chen, Y. T. Qi, Y. F. Xie, H. Qian, W. R. Yao, R. J. Pei, *Biosens. Bioelectron.*, 2017, **87**, 320–324.
- 9 Y. Zang, J. P. Lei, P. H. Ling, H. X. Ju, *Anal. Chem.*, 2015, **87**, 5430–5436.
